# Supplementary material for: Adsorption kinetics and solubilisation of ciprofloxacin in quaternary ammonium-based surface-active compounds: experimental and computational study
Source: Royal Society of Chemistry journal article supplement (doi:10.1039/d4sm00936c), 2024-12-04
Supplement: d4sm00936c1.pdf [file d4sm00936c1.pdf]

## **Supplementary data**

### **Adsorption kinetics and solubilisation of ciprofloxacin in quaternary ammonium based surface active compounds: Experimental and computational study**

Ab Raouf Bhat and Rajan Patel\*

Biophysical Chemistry Laboratory, Centre for Interdisciplinary Research in Basic Sciences, Jamia Millia Islamia, New Delhi, India.

\*Corresponding author.

Tel.: +91 8860634100; fax: +91 11 26983409.

Email address: [rpatel@jmi.ac.in](mailto:rpatel@jmi.ac.in), (Dr. R. Patel)

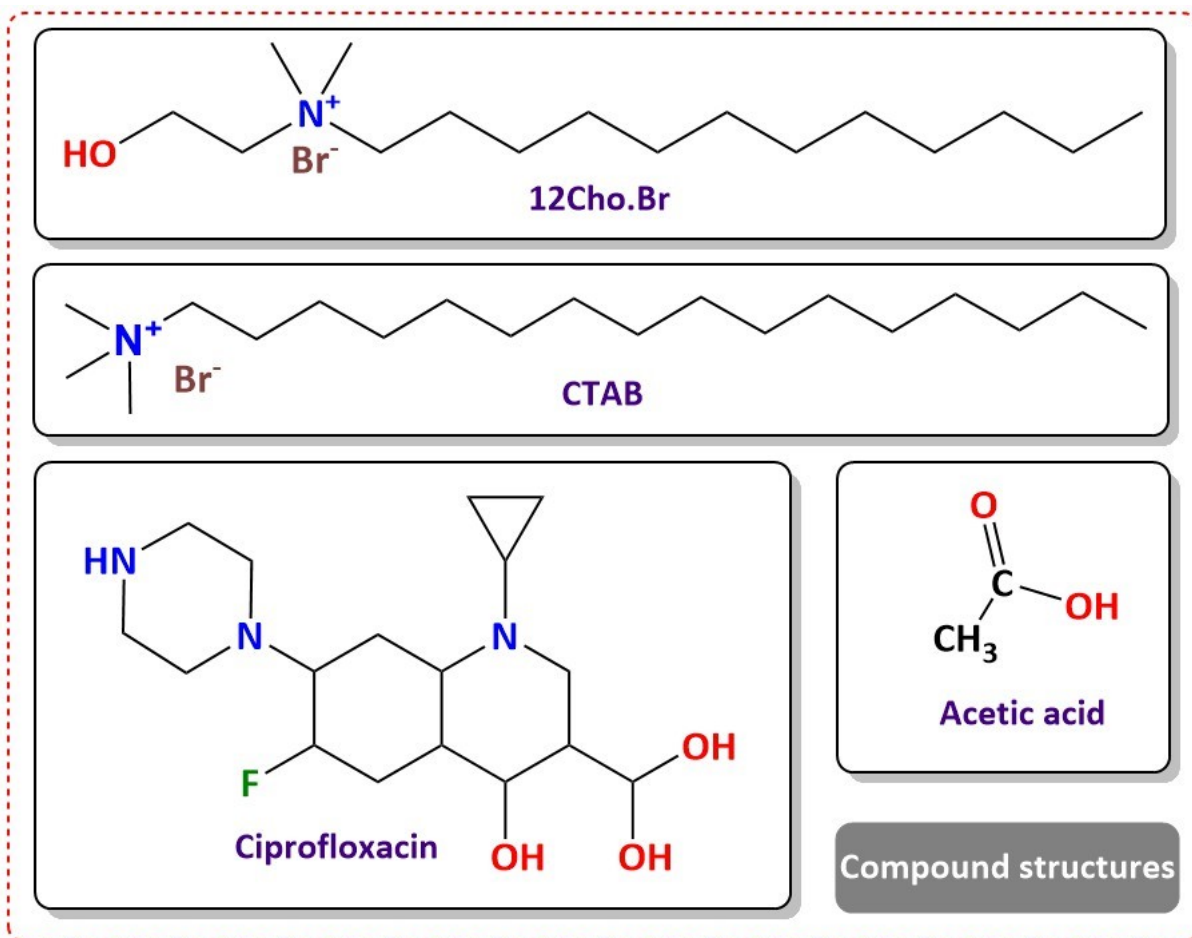

Scheme S1. Showing the 2D structure of compounds used in the study.

## Figure captions:

Figure S1. Generalized dynamic interfacial tension,  $\gamma_t$  versus log time (s), curve--region I: induction; region II: rapid fall; region III: meso-equilibrium; region IV: equilibrium.

Figure S2 (a-d). DIFT versus surface age (s) for 12Cho.Br (a), 12Cho.Br(0.3%Ac) (b), 12Cho.Br-CIP (c) and 12Cho.Br-CIP(0.3%Ac) (d), in aqueous medium at different concentration at 298.15K.

Figure S3 (a-d). DIFT versus surface age (s) for CTAB (a), CTAB(0.3%Ac) (b), CTAB-CIP (c) and CTAB-CIP(0.3%Ac) (d) in aqueous medium at different concentration at 298.15K.

Figure S4. DIFT profiles of 0.3% acetic acid, 30 $\mu$ M CIP and 30 $\mu$ M CIP in presence 0.3% acetic acid in aqueous medium as a function of time(s).

Figure 5 (a-c). DIFT as a function of  $t^{1/2}$  (a),  $t^{-1/2}$  (b) and plot of  $\log(\gamma_o-\gamma_t/\gamma_t-\gamma_m)$  versus  $\log t$  (c) for 12Cho.Br-CIP (30 $\mu$ M CIP) at different concentration at 298.15K.

Figure S6 (a-c). DIFT as a function of  $t^{1/2}$  (a),  $t^{-1/2}$  (b) and plot of  $\log(\gamma_o-\gamma_t/\gamma_t-\gamma_m)$  versus  $\log t$  (c) for 12Cho.Br(0.3%Ac) at different concentration at 298.15K.

Figure S7 (a-c). DIFT as a function of  $t^{1/2}$  (a),  $t^{-1/2}$  (b) and plot of  $\log(\gamma_o-\gamma_t/\gamma_t-\gamma_m)$  versus  $\log t$  (c) for 12Cho.Br-CIP (0.3%Ac) at different concentration at 298.15K.

Figure S8 (a-c). DIFT as a function of  $t^{1/2}$  (a),  $t^{-1/2}$  (b) and plot of  $\log(\gamma_o-\gamma_t/\gamma_t-\gamma_m)$  versus  $\log t$  (c) for CTAB(0.3%Ac) at different concentration at 298.15K.

Figure S9 (a-c). DIFT as a function of  $t^{1/2}$  (a),  $t^{-1/2}$  (b) and plot of  $\log(\gamma_o-\gamma_t/\gamma_t-\gamma_m)$  versus  $\log t$  (c) for CTAB-CIP (30 $\mu$ M CIP) at different concentration at 298.15K.

Figure S10 (a-c). DIFT as a function of  $t^{1/2}$  (a),  $t^{-1/2}$  (b) and plot of  $\log(\gamma_o-\gamma_t/\gamma_t-\gamma_m)$  versus  $\log t$  (c) for CTAB-CIP (0.3%Ac) at different concentration at 298.15K.

Figure S11 (a-c). DIFT as a function of  $t^{1/2}$  (a),  $t^{-1/2}$  (b) and plot of  $\log(\gamma_o-\gamma_t/\gamma_t-\gamma_m)$  versus  $\log t$  (c) for (4mM) 12Cho.Br with different concentration of CIP at 298.15K.

Figure S12 (a-c). DIFT as a function of  $t^{1/2}$  (a),  $t^{-1/2}$  (b) and plot of  $\log(\gamma_o-\gamma_t/\gamma_t-\gamma_m)$  versus  $\log t$  (c) for (4mM) 12Cho.Br(0.3%Ac) with different concentration of CIP at 298.15K.

Figure S13 (a-c). DIFT as a function of  $t^{1/2}$  (a),  $t^{-1/2}$  (b) and plot of  $\log(\gamma_o-\gamma_t/\gamma_t-\gamma_m)$  versus  $\log t$  (c) for (0.5mM) CTAB with different concentration of CIP at 298.15K.

Figure S14 (a-c). DIFT as a function of  $t^{1/2}$  (a),  $t^{-1/2}$  (b) and plot of  $\log(\gamma_o-\gamma_t/\gamma_t-\gamma_m)$  versus  $\log t$  (c) for (0.5mM) CTAB (0.3%Ac) with different concentration of CIP at 298.15K.

Figure S15 (a-d): UV-Visible spectra of CIP at various concentrations solubilized in 12Cho.Br and CTAB systems at 298K.

Figure S16 a-b). Variation of  $\ln(I_o/I)$  with quencher concentration in aqueous solution at 25 °C.

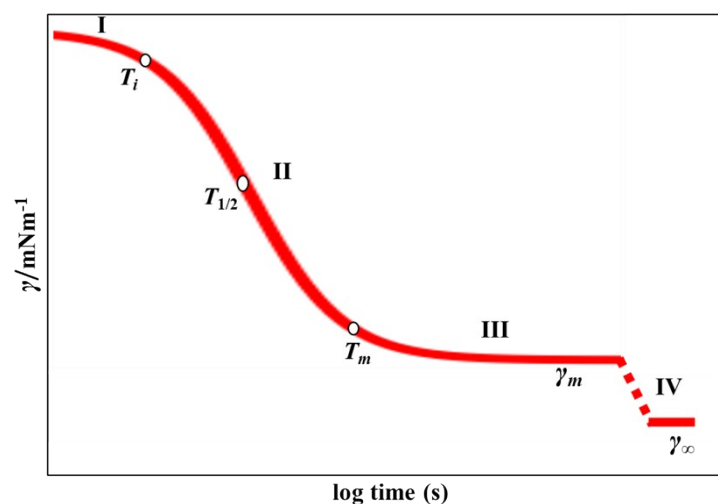

Figure S1. Generalized dynamic interfacial tension,  $\gamma_t$  versus  $\log$  time (s) curve - region I: induction; region II: rapid fall; region III: meso-equilibrium; region IV: equilibrium.

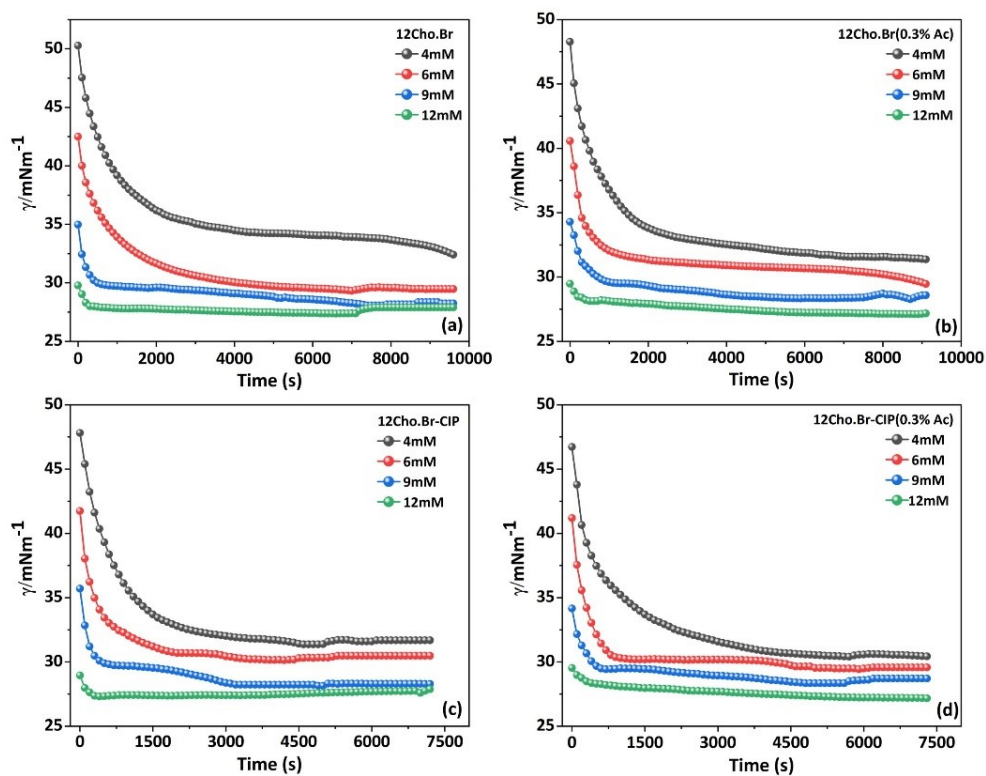

Figure S2 (a-d). DIFT versus surface age (s) for 12Cho.Br (a), 12Cho.Br(0.3%Ac) (b), 12Cho.Br-CIP (c) and 12Cho.Br-CIP(0.3%Ac) (d), in aqueous medium at different concentration at 298.15K.

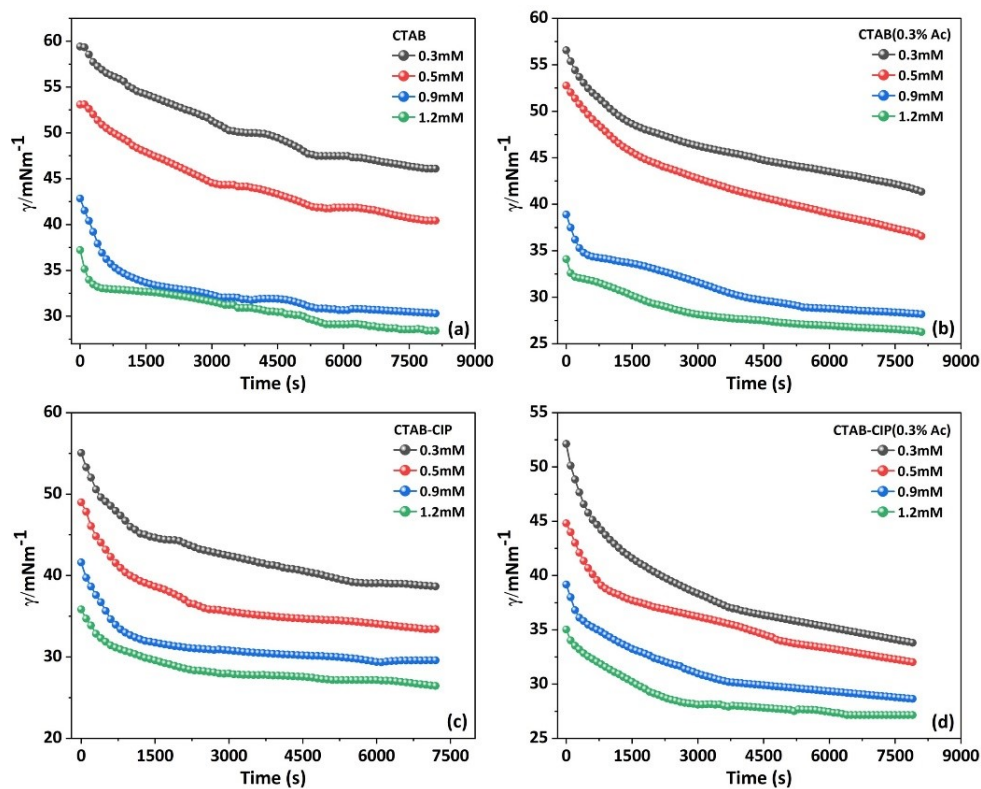

Figure S3 (a-d). DIFT versus surface age (s) for CTAB (a), CTAB(0.3%Ac) (b), CTAB-CIP (c) and CTAB-CIP(0.3%Ac) (d) in aqueous medium at different concentration at 298.15K.

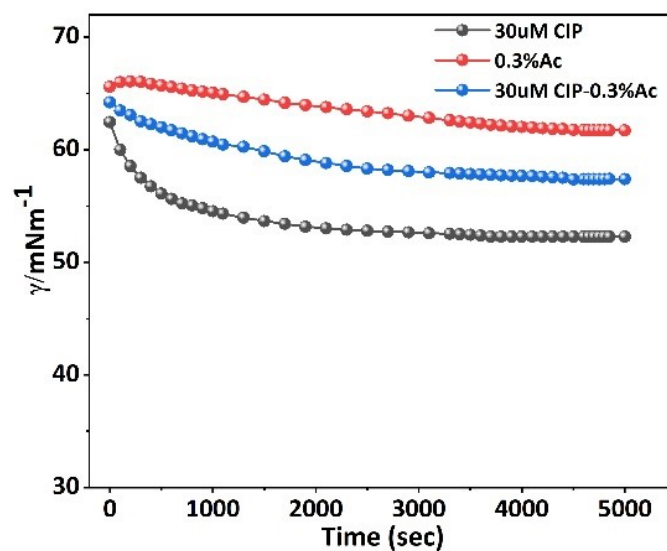

Figure S4. DIFT profiles of 0.3% acetic acid, 30 $\mu\text{M}$  CIP and 30 $\mu\text{M}$  CIP in presence 0.3% acetic acid in aqueous medium as a function of time(s).

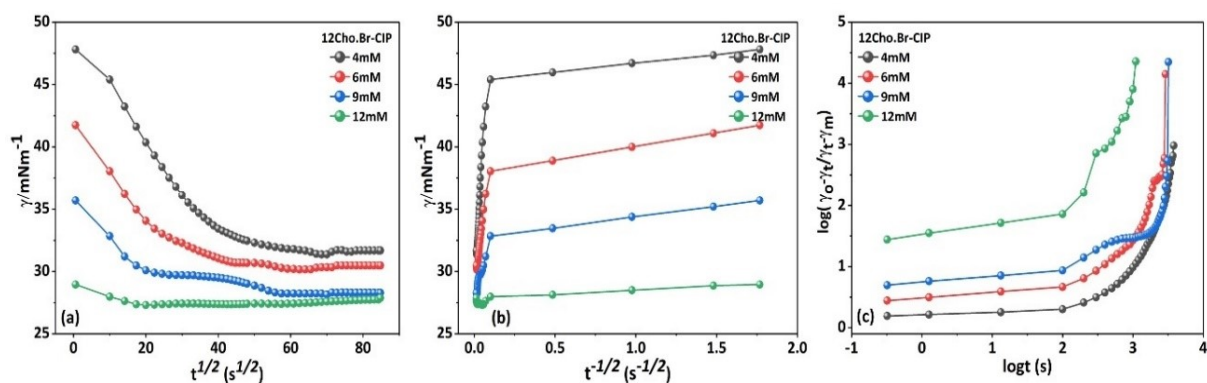

Figure 5 (a-c). DIFT as a function of  $t^{1/2}$  (a),  $t^{-1/2}$  (b) and plot of  $\log(\gamma_0 - \gamma_t / \gamma_t - \gamma_m)$  versus  $\log t$  (c) for 12Cho.Br-CIP (30 μM CIP) at different concentration at 298.15K.

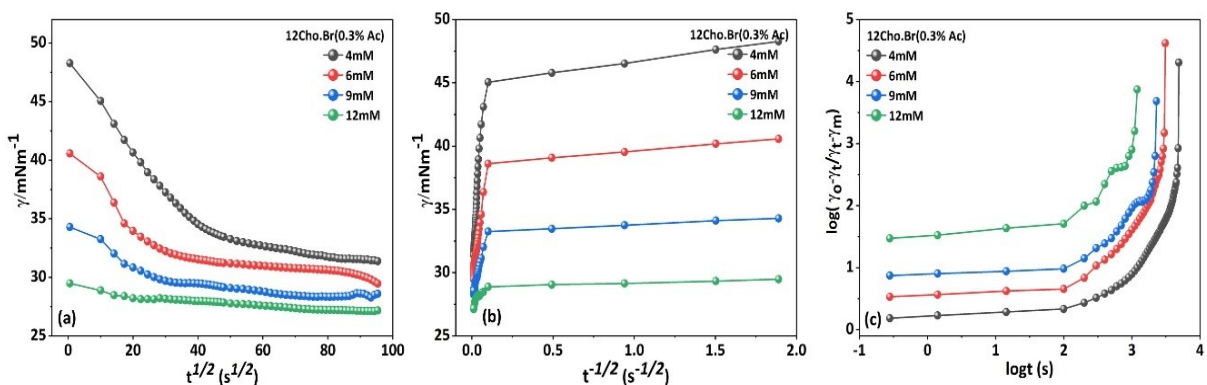

Figure S6 (a-c). DIFT as a function of  $t^{1/2}$  (a),  $t^{-1/2}$  (b) and plot of  $\log(\gamma_0 - \gamma_t / \gamma_t - \gamma_m)$  versus  $\log t$  (c) for 12Cho.Br(0.3% Ac) at different concentration at 298.15K.

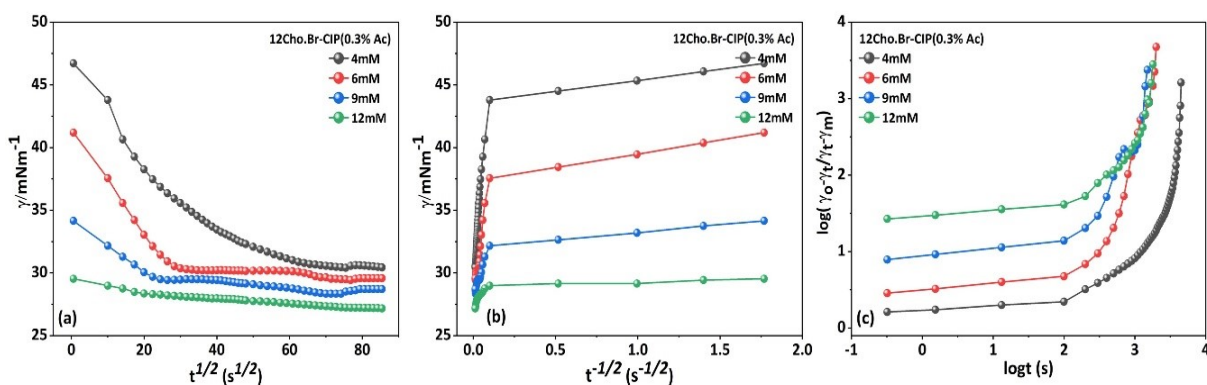

Figure S7 (a-c). DIFT as a function of  $t^{1/2}$  (a),  $t^{-1/2}$  (b) and plot of  $\log(\gamma_0 - \gamma_t / \gamma_t - \gamma_m)$  versus  $\log t$  (c) for 12Cho.Br-CIP (0.3% Ac) at different concentration at 298.15K.

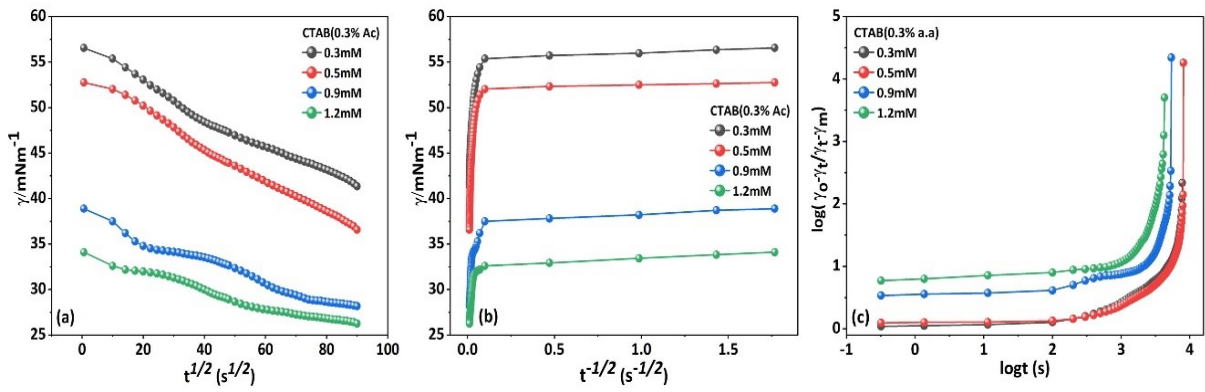

Figure S8 (a-c). DIFT as a function of  $t^{1/2}$  (a),  $t^{-1/2}$  (b) and plot of  $\log(\gamma_\infty - \gamma_t / \gamma_\infty - \gamma_m)$  versus  $\log t$  (c) for CTAB(0.3%Ac) at different concentration at 298.15K.

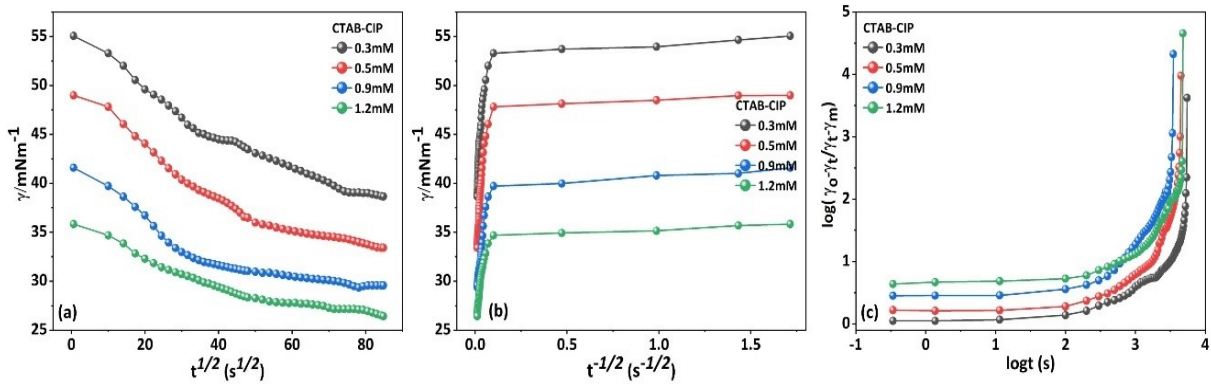

Figure S9 (a-c). DIFT as a function of  $t^{1/2}$  (a),  $t^{-1/2}$  (b) and plot of  $\log(\gamma_\infty - \gamma_t / \gamma_\infty - \gamma_m)$  versus  $\log t$  (c) for CTAB-CIP (30 μM CIP) at different concentration at 298.15K.

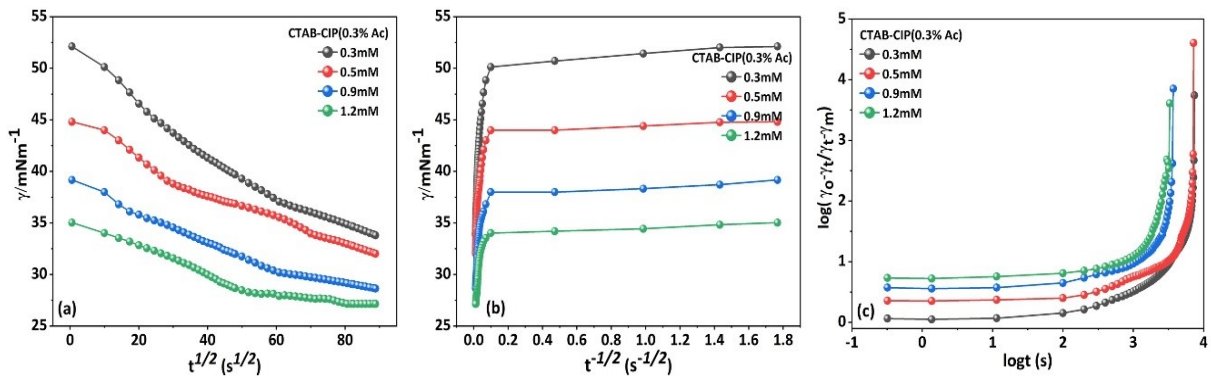

Figure S10 (a-c). DIFT as a function of  $t^{1/2}$  (a),  $t^{-1/2}$  (b) and plot of  $\log(\gamma_\infty - \gamma_t / \gamma_\infty - \gamma_m)$  versus  $\log t$  (c) for CTAB-CIP (0.3%Ac) at different concentration at 298.15K.

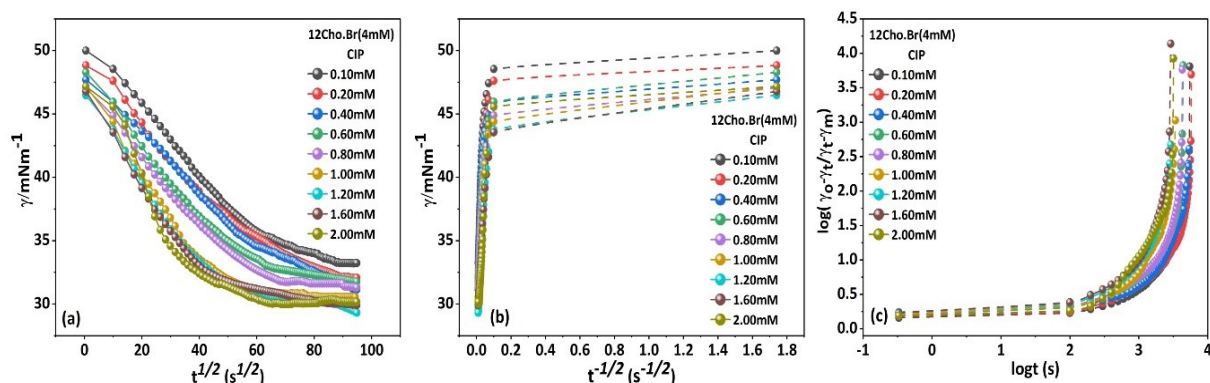

Figure S11 (a-c). DIFT as a function of  $t^{1/2}$  (a),  $t^{-1/2}$  (b) and plot of  $\log(\gamma_o - \gamma_t / \gamma_r - \gamma_m)$  versus  $\log t$  (c) for (4mM) 12Cho.Br with different concentration of CIP at 298.15K.

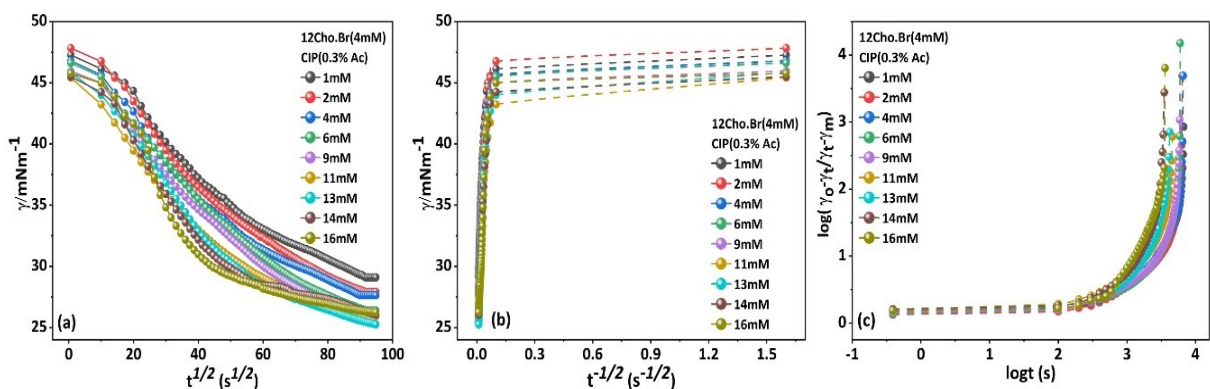

Figure S12 (a-c). DIFT as a function of  $t^{1/2}$  (a),  $t^{-1/2}$  (b) and plot of  $\log(\gamma_o - \gamma_t / \gamma_r - \gamma_m)$  versus  $\log t$  (c) for (4mM) 12Cho.Br(0.3%Ac) with different concentration of CIP at 298.15K.

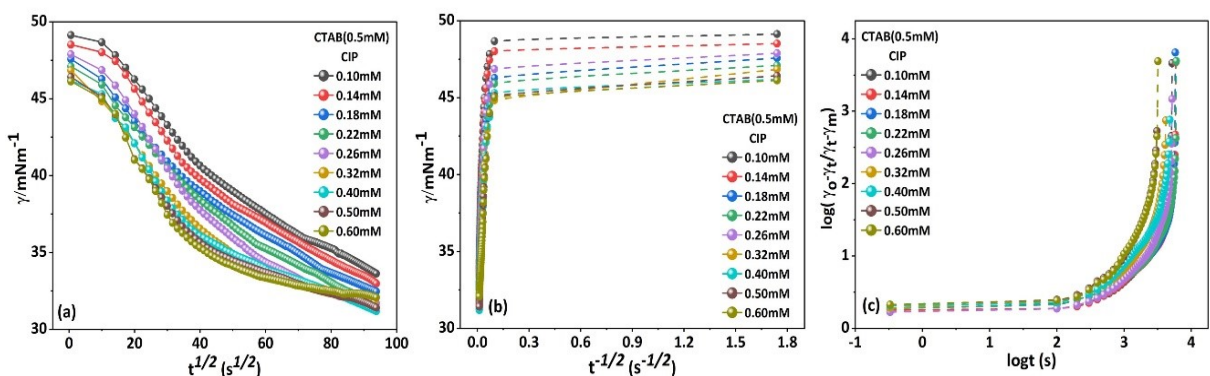

Figure S13 (a-c). DIFT as a function of  $t^{1/2}$  (a),  $t^{-1/2}$  (b) and plot of  $\log(\gamma_o - \gamma_t / \gamma_r - \gamma_m)$  versus  $\log t$  (c) for (0.5mM) CTAB with different concentration of CIP at 298.15K.



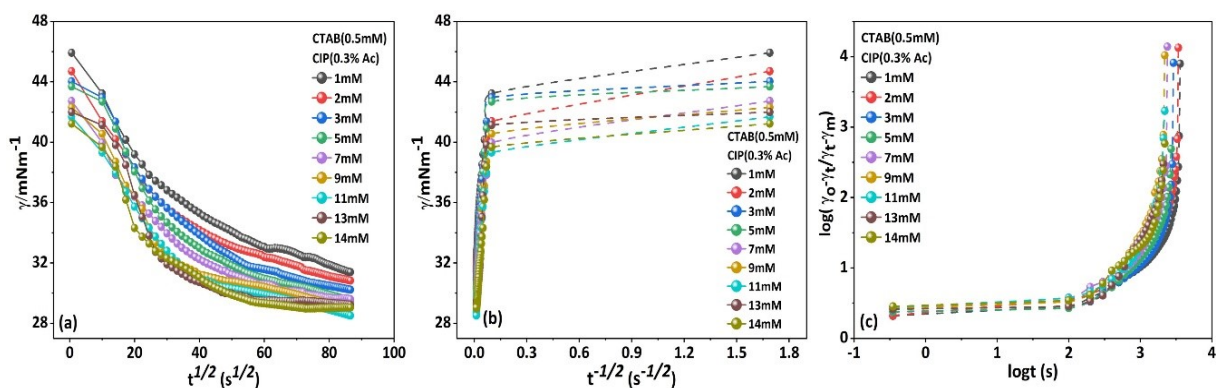

Figure S14 (a-c). DIFT as a function of  $t^{1/2}$  (a),  $t^{-1/2}$  (b) and plot of  $\log(\gamma_\sigma - \gamma_t / \gamma_r - \gamma_m)$  versus  $\log t$  (c) for (0.5mM) CTAB (0.3%Ac) with different concentration of CIP at 298.15K.

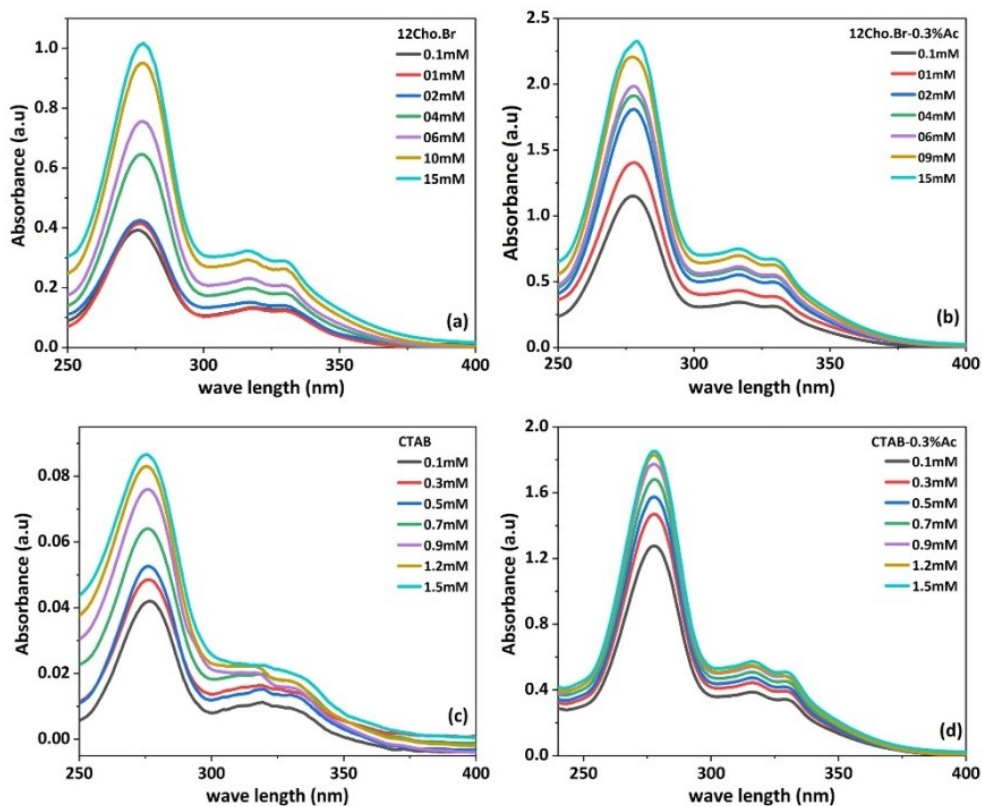

Figure S15 (a-d): UV-Visible spectra of CIP at various concentrations solubilized in 12Cho.Br and CTAB systems at 298K.

## Aggregation number

Steady-state fluorescence measurements were carried out using Cary Eclipse fluorescence spectrophotometer, Agilent technology. at temperature  $25 \pm 0.1$  °C. A quartz cuvette of 1 cm path length was used to record the spectra. Pyrene fluorescence probe spectroscopy was utilised to study the aggregation number of the 12Cho.Br and CTAB systems. The emission spectra of pyrene were recorded from 340 to 450 nm using an excitation wavelength of 334 nm. Excitation and emission band slits were kept at 5 nm. The micelles aggregation number ( $N_{agg}$ ) was concluded by performing a pyrene fluorescence quenching experiment using the quencher cetylpyridinium chloride and the following equation S1 was utilised.

$$\ln(I_0/I) = N_{agg}C_Q / C_{SACs} - cmc \quad (S1)$$

where,  $I_0$  and  $I$  are the fluorescence emission intensities of pyrene in the absence and presence quencher.  $C_{SACs}$  and  $C_Q$  are the concentration of 12Cho.Br and CTAB and quencher respectively. Figure S16 displays the  $\ln(I_0/I)$  plot for the different SACs systems as a function of quencher concentration.

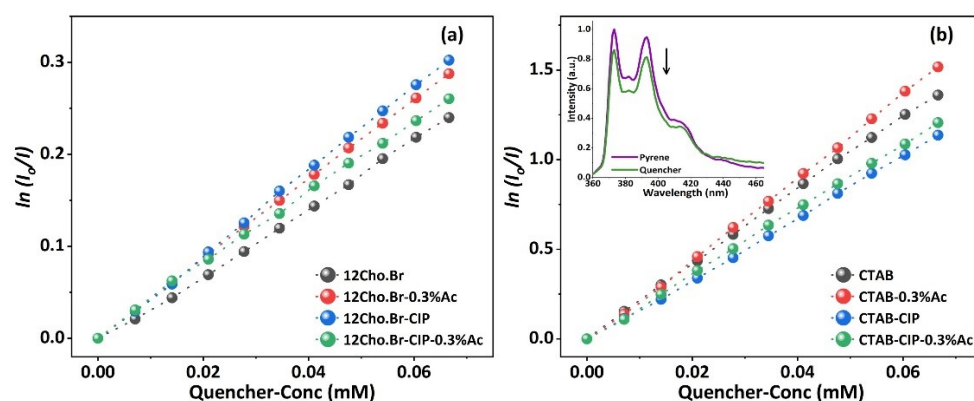

Figure S16 (a-b). Variation of  $\ln(I_0/I)$  with quencher concentration in aqueous solution at 25 °C.

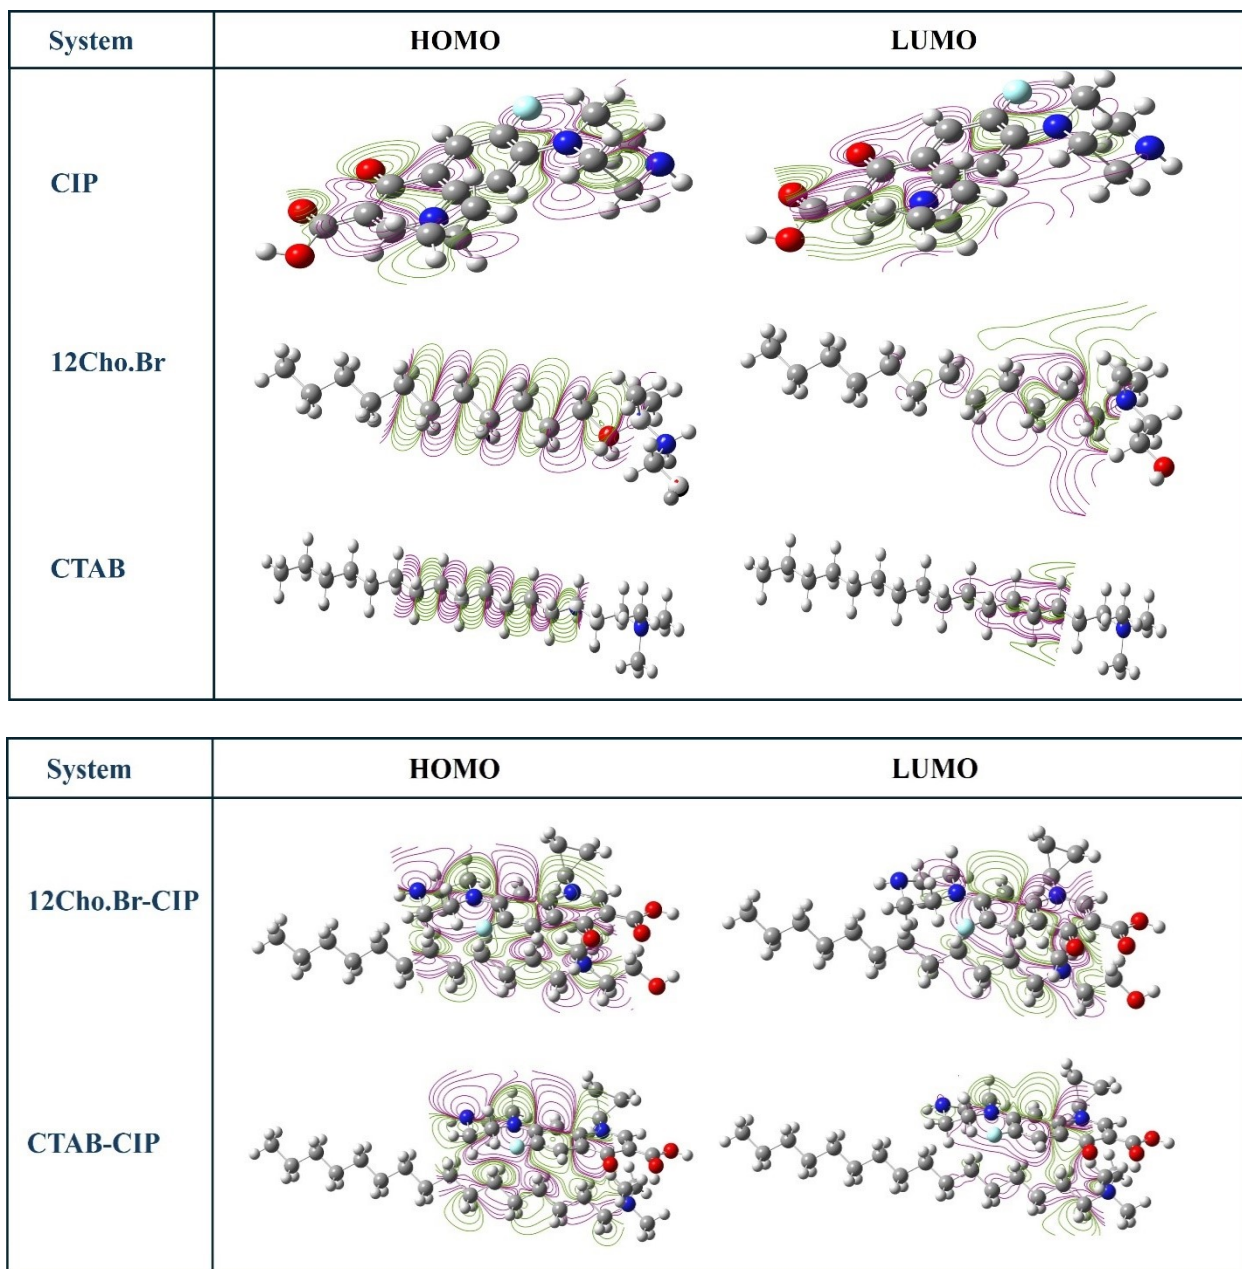

**Figure S17** Optimized structures of CIP, 12Cho.Br, CTAB, 12Cho.Br-CIP and CTAB-CIP with corresponding 2D electrostatic potential profiles

## **Table captions:**

**Table S1. DIFT parameters for (4mM) 12Cho.Br with different concentration of CIP at 298.15K.**

**Table S2. DIFT parameters for (4mM) 12Cho.Br(0.3%Ac) with different concentration of CIP at 298.15K.**

**Table S3. DIFT parameters for (0.5mM) Ctab with different concentration of CIP at 298.15K.**

**Table S4. DIFT parameters for (0.5mM) CTAB (0.3%Ac) with different concentration of CIP at 298.15K.**

**Table S5. Showing different parameters calculated from UV-Visible spectral data: amount of CIP solubilized, partition coefficient ( $P$ ), and standard free energy of solubilization ( $\Delta G$ ) in 12Cho.Br and CTAB systems in absence and presence of 0.3%Ac at 298.15K.**

**Table S6. Showing Aggregation number ( $N_{Agg}$ ), number of molecules solubilized ( $n_s$ ), number of micelles available ( $n_m$ )**

**Table S7. Physiochemical descriptors of various systems based on DFT calculations.**

**Table S1. DIFT parameters for (4mM) 12Cho.Br with different concentration of CIP at 298.15K.**

| Conc(mM)            | $\gamma_m$ (mNm <sup>-1</sup> ) | $D_{t \rightarrow o}(m^2s^{-1})$ | $D_{t \rightarrow \infty}(m^2s^{-1})$ | n     | t*(s) |
|---------------------|---------------------------------|----------------------------------|---------------------------------------|-------|-------|
| <b>12Cho.Br-CIP</b> |                                 |                                  |                                       |       |       |
| 0.1                 | 34.28                           | 14.32×10 <sup>2</sup>            | 227.07×10 <sup>-1</sup>               | 0.680 | 33.19 |
| 0.2                 | 33.25                           | 37.96×10 <sup>-2</sup>           | 51.93×10 <sup>-1</sup>                | 0.658 | 29.76 |
| 0.4                 | 33.28                           | 97.48×10 <sup>-3</sup>           | 12.22×10 <sup>-1</sup>                | 0.626 | 21.61 |
| 0.6                 | 32.81                           | 46.99×10 <sup>-3</sup>           | 53.60×10 <sup>-2</sup>                | 0.652 | 16.98 |
| 0.8                 | 32.08                           | 27.63×10 <sup>-3</sup>           | 28.04×10 <sup>-2</sup>                | 0.627 | 14.36 |
| 1.0                 | 31.24                           | 19.81×10 <sup>-3</sup>           | 17.22×10 <sup>-2</sup>                | 0.639 | 10.38 |
| 1.2                 | 31.29                           | 14.04×10 <sup>-3</sup>           | 11.38×10 <sup>-2</sup>                | 0.577 | 5.46  |
| 1.6                 | 31.49                           | 78.69×10 <sup>-4</sup>           | 64.67×10 <sup>-3</sup>                | 0.686 | 7.37  |
| 2.0                 | 30.69                           | 51.90×10 <sup>-4</sup>           | 41.79×10 <sup>-3</sup>                | 0.672 | 8.84  |

**Table S2. DIFT parameters for (4mM) 12Cho.Br(0.3%Ac) with different concentration of CIP at 298.15K.**

| Conc(mM)CIP                | $\gamma_m$ (mNm <sup>-1</sup> ) | $D_{t \rightarrow o}(m^2s^{-1})$ | $D_{t \rightarrow \infty}(m^2s^{-1})$ | n     | t*(s) |
|----------------------------|---------------------------------|----------------------------------|---------------------------------------|-------|-------|
| <b>12Cho.Br-CIP-0.3%Ac</b> |                                 |                                  |                                       |       |       |
| 1.0                        | 30.29                           | 19.53×10 <sup>-3</sup>           | 12.85×10 <sup>-2</sup>                | 0.659 | 42.31 |
| 2.0                        | 29.17                           | 50.75×10 <sup>-4</sup>           | 31.80×10 <sup>-3</sup>                | 0.670 | 46.97 |
| 4.0                        | 28.74                           | 13.33×10 <sup>-4</sup>           | 74.81×10 <sup>-4</sup>                | 0.693 | 43.72 |
| 6.0                        | 27.94                           | 60.30×10 <sup>-5</sup>           | 32.35×10 <sup>-4</sup>                | 0.694 | 45.21 |
| 9.0                        | 27.35                           | 27.83×10 <sup>-5</sup>           | 13.77×10 <sup>-4</sup>                | 0.649 | 37.16 |
| 11.0                       | 27.93                           | 19.98×10 <sup>-5</sup>           | 88.16×10 <sup>-5</sup>                | 0.606 | 17.33 |
| 13.0                       | 27.83                           | 14.45×10 <sup>-5</sup>           | 63.44×10 <sup>-5</sup>                | 0.634 | 20.00 |
| 14.0                       | 28.51                           | 12.70×10 <sup>-5</sup>           | 54.19×10 <sup>-5</sup>                | 0.665 | 15.35 |
| 16.0                       | 28.17                           | 99.67×10 <sup>-6</sup>           | 41.51×10 <sup>-5</sup>                | 0.695 | 16.38 |

**Table S3. DIFT parameters for (0.5mM) Ctab with different concentration of CIP at 298.15K.**

| Conc(mM)CIP     | $\gamma_m$ (mNm <sup>-1</sup> ) | $D_{t \rightarrow o}(m^2s^{-1})$ | $D_{t \rightarrow \infty}(m^2s^{-1})$ | n     | t*(s) |
|-----------------|---------------------------------|----------------------------------|---------------------------------------|-------|-------|
| <b>CTAB-CIP</b> |                                 |                                  |                                       |       |       |
| 0.10            | 35.88                           | 15.66×10 <sup>-1</sup>           | 120.42×10 <sup>-1</sup>               | 0.606 | 21.32 |
| 0.14            | 34.85                           | 83.62×10 <sup>-2</sup>           | 58.09×10 <sup>-1</sup>                | 0.626 | 25.28 |
| 0.18            | 34.06                           | 53.39×10 <sup>-2</sup>           | 32.35×10 <sup>-1</sup>                | 0.582 | 18.07 |
| 0.22            | 33.38                           | 37.16×10 <sup>-2</sup>           | 20.74×10 <sup>-1</sup>                | 0.626 | 21.83 |
| 0.26            | 33.02                           | 27.54×10 <sup>-2</sup>           | 15.15×10 <sup>-1</sup>                | 0.627 | 20.80 |
| 0.32            | 33.24                           | 19.24×10 <sup>-2</sup>           | 93.35×10 <sup>-2</sup>                | 0.602 | 10.28 |
| 0.40            | 33.21                           | 12.36×10 <sup>-2</sup>           | 57.70×10 <sup>-2</sup>                | 0.635 | 11.47 |
| 0.50            | 33.95                           | 80.82×10 <sup>-3</sup>           | 36.86×10 <sup>-2</sup>                | 0.581 | 4.83  |
| 0.60            | 33.56                           | 57.16×10 <sup>-3</sup>           | 25.20×10 <sup>-2</sup>                | 0.637 | 6.42  |

**Table S4. DIFT parameters for (0.5mM) CTAB (0.3%Ac) with different concentration of CIP at 298.15K.**

| Conc(mM)CIP            | $\gamma_m$ (mNm <sup>-1</sup> ) | $D_{t \rightarrow o}$ (m <sup>2</sup> s <sup>-1</sup> ) | $D_{t \rightarrow \infty}$ (m <sup>2</sup> s <sup>-1</sup> ) | n     | t*(s) |
|------------------------|---------------------------------|---------------------------------------------------------|--------------------------------------------------------------|-------|-------|
| <b>CTAB-CIP-0.3%Ac</b> |                                 |                                                         |                                                              |       |       |
| 1.0                    | 33.05                           | 20.92×10 <sup>-3</sup>                                  | 92.45×10 <sup>-3</sup>                                       | 0.614 | 5.86  |
| 2.0                    | 32.56                           | 54.82×10 <sup>-4</sup>                                  | 21.93×10 <sup>-3</sup>                                       | 0.669 | 5.48  |
| 3.0                    | 31.91                           | 25.06×10 <sup>-4</sup>                                  | 91.33×10 <sup>-4</sup>                                       | 0.560 | 3.58  |
| 5.0                    | 31.53                           | 93.29×10 <sup>-5</sup>                                  | 31.79×10 <sup>-4</sup>                                       | 0.528 | 2.44  |
| 7.0                    | 31.32                           | 49.13×10 <sup>-5</sup>                                  | 15.21×10 <sup>-4</sup>                                       | 0.585 | 2.06  |
| 9.0                    | 30.86                           | 30.51×10 <sup>-5</sup>                                  | 89.56×10 <sup>-5</sup>                                       | 0.671 | 2.51  |
| 11.0                   | 30.39                           | 20.79×10 <sup>-5</sup>                                  | 57.87×10 <sup>-5</sup>                                       | 0.578 | 1.75  |
| 13.0                   | 30.07                           | 15.13×10 <sup>-5</sup>                                  | 42.04×10 <sup>-5</sup>                                       | 0.526 | 1.44  |
| 14.0                   | 30.11                           | 13.09×10 <sup>-5</sup>                                  | 34.86×10 <sup>-5</sup>                                       | 0.501 | 1.01  |

**Table S5. Showing different parameters calculated from UV-Visible spectral data: amount of CIP solubilized, partition coefficient (P), and standard free energy of solubilization ( $\Delta G$ ) in 12Cho.Br and CTAB systems in absence and presence of 0.3%Ac at 298.15K.**

|                                       | <b>12Cho.Br (mM)</b> |        |        |         |         |        |        |
|---------------------------------------|----------------------|--------|--------|---------|---------|--------|--------|
| Concentration                         | 0.1                  | 1      | 2      | 4       | 6       | 10     | 15     |
| <b>CIP Solubility (mM)</b>            |                      |        |        |         |         |        |        |
| 12Cho.Br                              | 0.66                 | 0.70   | 0.71   | 1.10    | 1.30    | 1.63   | 1.74   |
| 12Cho.Br (0.3%Ac)                     | 7.711                | 9.40   | 12.13  | 12.80   | 13.32   | 14.59  | 15.59  |
| <b>Partition coefficient (P)</b>      |                      |        |        |         |         |        |        |
| 12Cho.Br                              | 10.11                | 10.80  | 10.93  | 17.46   | 20.76   | 26.23  | 28.13  |
| 12Cho.Br (0.3%Ac)                     | 127.51               | 155.68 | 201.18 | 212.48  | 221.01  | 242.21 | 258.88 |
| <b><math>\Delta G</math> (kJ/mol)</b> |                      |        |        |         |         |        |        |
| 12Cho.Br                              | -5.73                | -5.89  | -5.92  | -7.08   | -7.51   | -8.09  | -8.26  |
| 12Cho.Br (0.3%Ac)                     | -12.01               | -12.50 | -13.14 | -13.27  | -13.37  | -13.60 | -13.76 |
| <b>CTAB (mM)</b>                      |                      |        |        |         |         |        |        |
| Concentration                         | 0.1                  | 0.3    | 0.5    | 0.7     | 0.9     | 1.2    | 1.5    |
| <b>CIP Solubility (mM)</b>            |                      |        |        |         |         |        |        |
| CTAB                                  | 0.25                 | 0.29   | 0.31   | 0.38    | 0.45    | 0.49   | 0.52   |
| CTAB (0.3%Ac)                         | 7.69                 | 8.89   | 9.51   | 10.17   | 10.71   | 11.04  | 11.20  |
| <b>Partition coefficient (P)</b>      |                      |        |        |         |         |        |        |
| CTAB                                  | 3.20                 | 3.88   | 4.28   | 5.43    | 6.65    | 7.31   | 7.71   |
| CTAB (0.3%Ac)                         | 127.21               | 147.18 | 157.53 | 168.500 | 177.516 | 183.13 | 185.70 |
| <b><math>\Delta G</math> (kJ/mol)</b> |                      |        |        |         |         |        |        |
| CTAB                                  | -2.88                | -3.36  | -3.60  | -4.19   | -4.69   | -4.93  | -5.06  |
| CTAB (0.3%Ac)                         | -12.01               | -12.36 | -12.53 | -12.70  | -12.83  | -12.90 | -12.94 |

**Table S6. Showing Aggregation number ( $N_{Agg}$ ), number of molecules solubilized ( $n_s$ ), number of micelles available ( $n_m$ )**

| System                     | ( $N_{Agg}$ ) | $n_s$ | $n_m$                 |
|----------------------------|---------------|-------|-----------------------|
| <b>12Cho.Br</b>            | 41            | --    | $1.38 \times 10^{20}$ |
| <b>12Cho.Br-0.3%Ac</b>     | 48            | --    | $1.08 \times 10^{20}$ |
| <b>12Cho.Br-CIP</b>        | 44            | 08    | $1.22 \times 10^{20}$ |
| <b>12Cho.Br-CIP-0.3%Ac</b> | 41            | 60    | $1.45 \times 10^{20}$ |
|                            |               |       |                       |
| <b>CTAB</b>                | 33            | --    | $2.77 \times 10^{19}$ |
| <b>CTAB-0.3%Ac</b>         | 32            | --    | $2.52 \times 10^{19}$ |
| <b>CTAB-CIP</b>            | 26            | 06    | $3.29 \times 10^{19}$ |
| <b>CTAB-CIP-0.3%Ac</b>     | 29            | 195   | $3.28 \times 10^{19}$ |

**Table S7. Physiochemical descriptors of various systems based on DFT calculations.**

| Parameters                                                | CIP      | CTAB    | 12Cho.Br | CTAB- CIP | 12Cho.Br-CIP |
|-----------------------------------------------------------|----------|---------|----------|-----------|--------------|
| $E_{LUMO}(-)$                                             | 0.06089  | 0.02193 | 0.02638  | 0.07467   | 0.07792      |
| $E_{HOMO}(-)$                                             | 0.20119  | 0.26503 | 0.27359  | 0.21216   | 0.21059      |
| $E_{LUMO} - E_{HOMO}$                                     | 0.14030  | 0.28696 | 0.29997  | 0.13749   | 0.13267      |
| $E_{HOMO} + E_{LUMO}(-)$                                  | 0.26208  | 0.2431  | 0.24721  | 0.28683   | 0.28851      |
| <b>Chemical hardness (<math>\eta</math>)</b>              | 0.07015  | 0.14348 | 0.14998  | 0.06874   | 0.06633      |
| <b>Electronegativity (<math>\chi</math>)</b>              | 0.13104  | 0.12155 | 0.123605 | 0.14341   | 0.14425      |
| <b>Softness (<math>S</math>)</b>                          | 7.12758  | 3.48480 | 3.33366  | 7.27325   | 7.53749      |
| <b>Chemical potential (<math>\mu</math>) (-)</b>          | 0.13104  | 0.12155 | 0.12360  | 0.14341   | 0.14425      |
| <b>Global electrophilicity index(<math>\omega</math>)</b> | 0.12239  | 0.05148 | 0.05093  | 0.14959   | 0.15685      |
| <b>Dipole moment(Debye)</b>                               | 15.3246  | 39.5339 | 22.6555  | 22.5239   | 14.0494      |
| <b><math>E</math> (optimized structure) (-)</b>           | 1148.567 | 804.129 | 761.385  | 1952.521  | 1909.776     |
